# Supplementary material for: Positive predictive value of cardiovascular diagnoses in the Danish National Patient Registry: a validation study
Source: PubMed Central journal article supplement — BMJ Open. 2016 Nov 18;6(11):e012832. doi: 10.1136/bmjopen-2016-012832 (PMC5129042; doi:10.1136/bmjopen-2016-012832), 2016-11-18
Supplement: bmjopen-2016-012832supp.pdf [file bmjopen-2016-012832supp.pdf]

## **SUPPLEMENTAL MATERIAL**

### **Positive predictive value of cardiovascular diagnoses in the Danish National Patient Registry: a validation study**

Jens Sundbøll; Kasper Adelborg; Troels Munch; Trine Frøslev;  
Henrik Toft Sørensen; Hans Erik Bøtker; Morten Schmidt

Corresponding author: Jens Sundbøll, Department of Clinical Epidemiology, Aarhus University  
Hospital, Olof Palmes Allé 43-45, DK-8200 Aarhus N, Denmark; Tel: +45 8716 8246;  
Fax: +45 8716 7215; Email: jens.sundboll@clin.au.dk

#### Contents

|                       |                                                      |
|-----------------------|------------------------------------------------------|
| Supplementary Table 1 | ICD-8 and ICD-10 codes for cardiovascular diagnoses. |
| Supplementary Table 2 | Medical chart extraction form.                       |

**Supplementary Table 1.** ICD-8 and ICD-10 codes for cardiovascular diagnoses.

|                                  | <b>ICD-8 code<sup>a</sup></b>                      | <b>ICD-10 code</b>                                                                          | <b>Location of admission</b> |
|----------------------------------|----------------------------------------------------|---------------------------------------------------------------------------------------------|------------------------------|
| <b>Myocardial infarction</b>     |                                                    |                                                                                             |                              |
| First-time myocardial infarction | 410                                                | I21                                                                                         | Inpatient                    |
| STEMI                            | N/A                                                | I211B, I210B, I213                                                                          | Inpatient                    |
| NSTEMI                           |                                                    | I211A, I210A, I214                                                                          | Inpatient                    |
| Recurrent myocardial infarction  | 410                                                | I21                                                                                         | Inpatient                    |
| Stent thrombosis                 | N/A                                                | T823D, T823E                                                                                | Inpatient                    |
| <b>Angina pectoris</b>           |                                                    |                                                                                             |                              |
| Stable angina pectoris           | 413                                                | I20 (without I200), I251, I259                                                              | Inpatient                    |
| Unstable angina pectoris         | 411                                                | I200                                                                                        | Inpatient                    |
| <b>Heart failure</b>             |                                                    |                                                                                             |                              |
| First-time heart failure         | 42709, 42710, 42711, 42719,<br>42899, 78249        | 1500, 1501, 1502, 1503, 1508,<br>1509, 1110,<br>1130, 1132, I420, I426, I427,<br>I428, I429 | Inpatient                    |
| Readmission for heart failure    | 42709, 42710, 42711, 42719,<br>42899, 78249        | 1500, 1501, 1502, 1503, 1508,<br>1509, 1110,<br>1130, 1132, I420, I426, I427,<br>I428, I429 | Inpatient                    |
| <b>Cardiomyopathy</b>            |                                                    |                                                                                             |                              |
| Dilated cardiomyopathy           | 425                                                | I420                                                                                        | Inpatient or outpatient      |
| Hypertrophic cardiomyopathy      | N/A                                                | I421, I422                                                                                  | Inpatient or outpatient      |
| Restrictive cardiomyopathy       | N/A                                                | I425                                                                                        | Inpatient or outpatient      |
| ARVC                             | N/A                                                | I428A                                                                                       | Inpatient or outpatient      |
| Takotsubo cardiomyopathy         | N/A                                                | I428B                                                                                       | Inpatient                    |
| <b>Hypertension</b>              |                                                    |                                                                                             |                              |
| Arterial hypertension            | 400–404                                            | I10-I15                                                                                     | Inpatient or outpatient      |
| Pulmonary hypertension           | 426                                                | I27                                                                                         | Inpatient or outpatient      |
| <b>Cardiac arrhythmias</b>       |                                                    |                                                                                             |                              |
| Atrial fibrillation or flutter   | 42793, 42794                                       | I48                                                                                         | Inpatient or outpatient      |
| Bradycardia                      | 42720, 42721, 42722, 42723                         | I440, I441, I442, I443, I455A,<br>I455B, I455C, I455G                                       | Inpatient or outpatient      |
| VT or VF                         | 42797, 42791                                       | I470, I472, I490                                                                            | Inpatient or outpatient      |
| Cardiac arrest                   | 42727, 42797                                       | I46                                                                                         | Inpatient                    |
| <b>Valvular heart disease</b>    |                                                    |                                                                                             |                              |
| Mitral regurgitation or stenosis | 394                                                | I05, I34, I390, I511A                                                                       | Inpatient or outpatient      |
| Aortic regurgitation or stenosis | 395                                                | I06, I35, I391                                                                              | Inpatient or outpatient      |
| <b>Inflammation/Infection</b>    |                                                    |                                                                                             |                              |
| Endocarditis                     | 421                                                | I33, I38, I398                                                                              | Inpatient or outpatient      |
| Myocarditis                      | 422                                                | I40, I41, I090, I514                                                                        | Inpatient or outpatient      |
| Pericarditis                     | 39109, 393, 420, 423                               | I30-I32                                                                                     | Inpatient or outpatient      |
| <b>Aortic diseases</b>           |                                                    |                                                                                             |                              |
| Aortic dissection                | 44109                                              | I710                                                                                        | Inpatient                    |
| Aortic aneurysm/dilatation       | 44110, 44111, 44119, 44120,<br>44121, 44129, 44199 | I711-I716, I718-I719                                                                        | Inpatient or outpatient      |
| <b>VTE</b>                       |                                                    |                                                                                             |                              |
| First-time VTE                   | 45100, 45108, 45109, 45099                         | I801-I803, I26                                                                              | Inpatient or outpatient      |
| First-time DVT                   | 45100, 45108, 45109                                | I801-3                                                                                      | Inpatient or outpatient      |
| First-time PE                    | 45099                                              | I26                                                                                         | Inpatient or outpatient      |
| Recurrent VTE                    | 45100, 45108, 45109, 45099                         | I801-I803, I26                                                                              | Inpatient                    |
| Recurrent DVT                    | 45100, 45108, 45109                                | I801-3                                                                                      | Inpatient                    |
| Recurrent PE                     | 45099                                              | I26                                                                                         | Inpatient                    |
| <b>Other</b>                     |                                                    |                                                                                             |                              |
| Arterial claudication            | 44389-44399                                        | I739A                                                                                       | Inpatient or outpatient      |
| Hypercholesterolemia             | 27200                                              | E780                                                                                        | Inpatient or outpatient      |
| Cardiac tumors                   | N/A                                                | C38, C380, C388, D151,<br>D487A, C380X, ZM88400                                             | Inpatient or outpatient      |
| <b>Diagnostic modalities</b>     |                                                    |                                                                                             |                              |
| CT scan                          | N/A                                                | UXCA                                                                                        | N/A                          |
| Ultra sound scan                 | N/A                                                | UXUG                                                                                        | N/A                          |

<sup>a</sup>ICD-8 codes were used to identify first-time and recurrent ICD-10 diagnoses.

Abbreviations: ICD, international classification of diseases; STEMI, ST-elevation myocardial infarction; NSTEMI, non-ST-elevation myocardial infarction; ARVC, arrhythmogenic right ventricular cardiomyopathy; VT or VF, ventricular tachycardia or ventricular fibrillation; VTE, venous thromboembolism; DVT, deep venous thrombosis; PE, pulmonary embolism; CT, computed tomography.

**Supplementary Table 2.** Medical chart extraction form

| <b>Variables</b>                       | <b>Explanation</b>                                                                                                              |
|----------------------------------------|---------------------------------------------------------------------------------------------------------------------------------|
| <b>Date</b>                            | Date of the medical record review                                                                                               |
| <b>Initials</b>                        | Initials of the investigator                                                                                                    |
| <b>CPR number</b>                      | Unique 10-digit Civil Personal Register number                                                                                  |
| <b>CPR number (check)</b>              | Confirmation of the CPR number                                                                                                  |
| <b>SKS code</b>                        | ICD-10 code of the diagnosis                                                                                                    |
| <b>Name of disease</b>                 | An abbreviation of the diagnosis                                                                                                |
| <b>Date of discharge</b>               | The date the patient was examined/discharged                                                                                    |
| <b>Correct diagnosis</b>               | 0=No, 1=Yes                                                                                                                     |
| <b>Correct diagnosis for subgroups</b> | 0=No, 1=Yes                                                                                                                     |
| <b>Data source</b>                     | 1=Discharge summary<br>2=Other medical record<br>3=Both 1+2                                                                     |
| <b>Algorithm</b>                       | 1=One investigator made the decision<br>2=A second independent reviewer agreed with the first reviewer<br>3=Consensus agreement |
| <b>Comments</b>                        | Any relevant comments                                                                                                           |
